# Supplementary material for: Photochemical aging of aerosols contributes significantly to the production of atmospheric formic acid
Source: Copernicus journal article supplement (doi:10.5194/egusphere-2023-1140), 2023-06-21
Supplement: Supplementary file 1 [file egusphere-2023-1140-supplement.pdf]

|    |                                                                                                                                                         |
|----|---------------------------------------------------------------------------------------------------------------------------------------------------------|
| 1  | <b>Table of contents</b>                                                                                                                                |
| 2  |                                                                                                                                                         |
| 3  | <b>Text S1.</b> Sampling of aerosol filters.                                                                                                            |
| 4  | <b>Text S2.</b> Additional setting information on the box model simulation of 28 September                                                              |
| 5  | 2021.                                                                                                                                                   |
| 6  | <b>Text S3.</b> The determination of $J_{\text{NO}_3^-(\text{aq})}$ and $J_{\text{O}_3 \rightarrow \text{O}^1\text{D}}$ in the chamber and ambient air. |
| 7  | <b>Text S4.</b> Additional laboratory experiments.                                                                                                      |
| 8  |                                                                                                                                                         |
| 9  | <b>Figure S1.</b> The location of the observation site, Cape D’Aguilar.                                                                                 |
| 10 | <b>Figure S2.</b> The variation of HCOOH sensitivity with RH.                                                                                           |
| 11 | <b>Figure S3.</b> The 24-h backward trajectories of different kinds of air masses during the                                                            |
| 12 | field campaign.                                                                                                                                         |
| 13 | <b>Figure S4.</b> The schematic diagram of the photochemical aging experiment.                                                                          |
| 14 | <b>Figure S5.</b> The sources of CH <sub>2</sub> OO in the modified case on 28 September 2021.                                                          |
| 15 | <b>Figure S6.</b> The model results on 28 October 2021.                                                                                                 |
| 16 | <b>Figure S7.</b> Additional laboratory experiments show that HCOOH was produced by                                                                     |
| 17 | nitrate rather than HONO.                                                                                                                               |
| 18 |                                                                                                                                                         |
| 19 | <b>Table S1.</b> The instruments and measured species or parameters in the field campaign.                                                              |
| 20 | <b>Table S2.</b> Summary of the PM <sub>2.5</sub> sampling information.                                                                                 |
| 21 | <b>Table S3.</b> Input parameters to the box model of 28 September 2021.                                                                                |
| 22 |                                                                                                                                                         |

**Text S1.** Sampling of aerosol filters.

We collected ambient aerosols at Cape D'Aguilar Super Site in Autumn for photochemical aging experiments. The PM<sub>2.5</sub> samples were collected on quartz-fiber filters (8 × 10 inches) using a PUF-1000 high-volume sampler with a flow rate of 999 Lpm in 2020. All samplings were performed from 11:00 am local time (LT) to 10:00 am LT of the next day. The filters were pre-fired at 900 °C for 4 hours to remove organic artifacts and stored in a freezer at -20 °C. Fractions with a given surface area from one randomized-chosen filter were used to perform the photochemical experiments or other analyses.

**Text S2.** Additional setting information on the box model simulation of 28 September 2021.

The observation data on 28 September was used as input to constrain the model with a time step of 5 min (Table S3). The data of trace gases (including O<sub>3</sub>, NO, NO<sub>2</sub>, CO and SO<sub>2</sub>) and data obtained by ToF-CIMS (including HONO and N<sub>2</sub>O<sub>5</sub>) were averaged to 5-min resolution. For the VOCs and OVOCs species, linear interpolations were applied. The variables “ModelOptions.EndPointsOnly” and “ModelOptions.LinkSteps” were set to “1”. The variable “ModelOptions.IntTime” was set to “300”. No family conservation was used. Readers are referred to a F0AM description paper for more information (Wolfe et al., 2016).

**Text S3.** The determination of  $J_{\text{NO}_3(\text{aq})}$  and  $J_{\text{O}_3 \rightarrow \text{O}^1\text{D}}$  in the chamber and ambient air.

The  $J_{\text{NO}_3(\text{aq})}$  and  $J_{\text{O}_3 \rightarrow \text{O}^1\text{D}}$  in the chamber was calculated by (Eq. (1)),

$$J = \int q(\lambda)\sigma(\lambda)I(\lambda)d\lambda \quad (1)$$

where  $q(\lambda)$  is the quantum yield at wavelength  $\lambda$  (nm);  $\sigma(\lambda)$  is the cross-section at wavelength  $\lambda$ ;  $I(\lambda)$  is the flux of xenon lamp at wavelength  $\lambda$  and was calculated by converting the irradiation energy spectra of the lamp (Fig. 6d) to photon flux based on Planck's equation. The  $q(\lambda)$  and  $\sigma(\lambda)$  of aqueous nitrate at 298 K were derived from (Chu & Anastasio, 2003). The  $q(\lambda)$  and  $\sigma(\lambda)$  of O<sub>3</sub> generating O<sup>1</sup>D were adopted from the recommended value from IUPAC under 298 K (<https://uv-vis-spectral-atlas-mainz.org/uvvis/index.html>). The  $J_{\text{NO}_3(\text{aq})}$  and  $J_{\text{O}_3 \rightarrow \text{O}^1\text{D}}$  in the ambient was calculated by the Tropospheric Ultraviolet and Visible (TUV) radiation model ([https://www.acom.ucar.edu/Models/TUV/Interactive\\_TUV/](https://www.acom.ucar.edu/Models/TUV/Interactive_TUV/)) under clear sky conditions and then scaled to the field-measured  $j_{\text{NO}_2}$ .

**Text S4.** Additional laboratory experiments.

Since HONO and HCOOH were simultaneously observed during the photochemical aging process, it is possible that HCOOH was produced from the heterogeneous

61 reactions between gas-phase OH radicals and particles. To check this possibility, an  
62 experiment was conducted as follows (Fig. S7). 4 Lpm HONO-containing air (78% RH,  
63 7.2 ppb HONO, balanced with zero air) was injected into the chamber. The solution  
64 was prepared with 0.15 wt.% HCHO but without adding NaNO<sub>3</sub>. The pH of the solution  
65 was also adjusted to 2.7 using sulfuric acid. The background HCOOH concentration  
66 was determined as 308.9 ppt when illuminating the chamber without the solution. After  
67 adding the solution, the HCOOH concentration increased to 428.8 ppt. After  
68 normalizing the HONO concentration in this experiment to that in the previous solution  
69 experiments containing NaNO<sub>3</sub> (0.77 ppb HONO, 0.62 ppb HCOOH) (Fig. 6c), the  
70 increased HCOOH concentration is 12.8 ppt, which is negligible. The conclusion is the  
71 same when compared with the filter irradiation experiments (4.1 ppb HONO, 5.6 ppb  
72 HCOOH). Therefore, the HONO photolysis contributes little to HCOOH production.

74 **Supplementary figures**

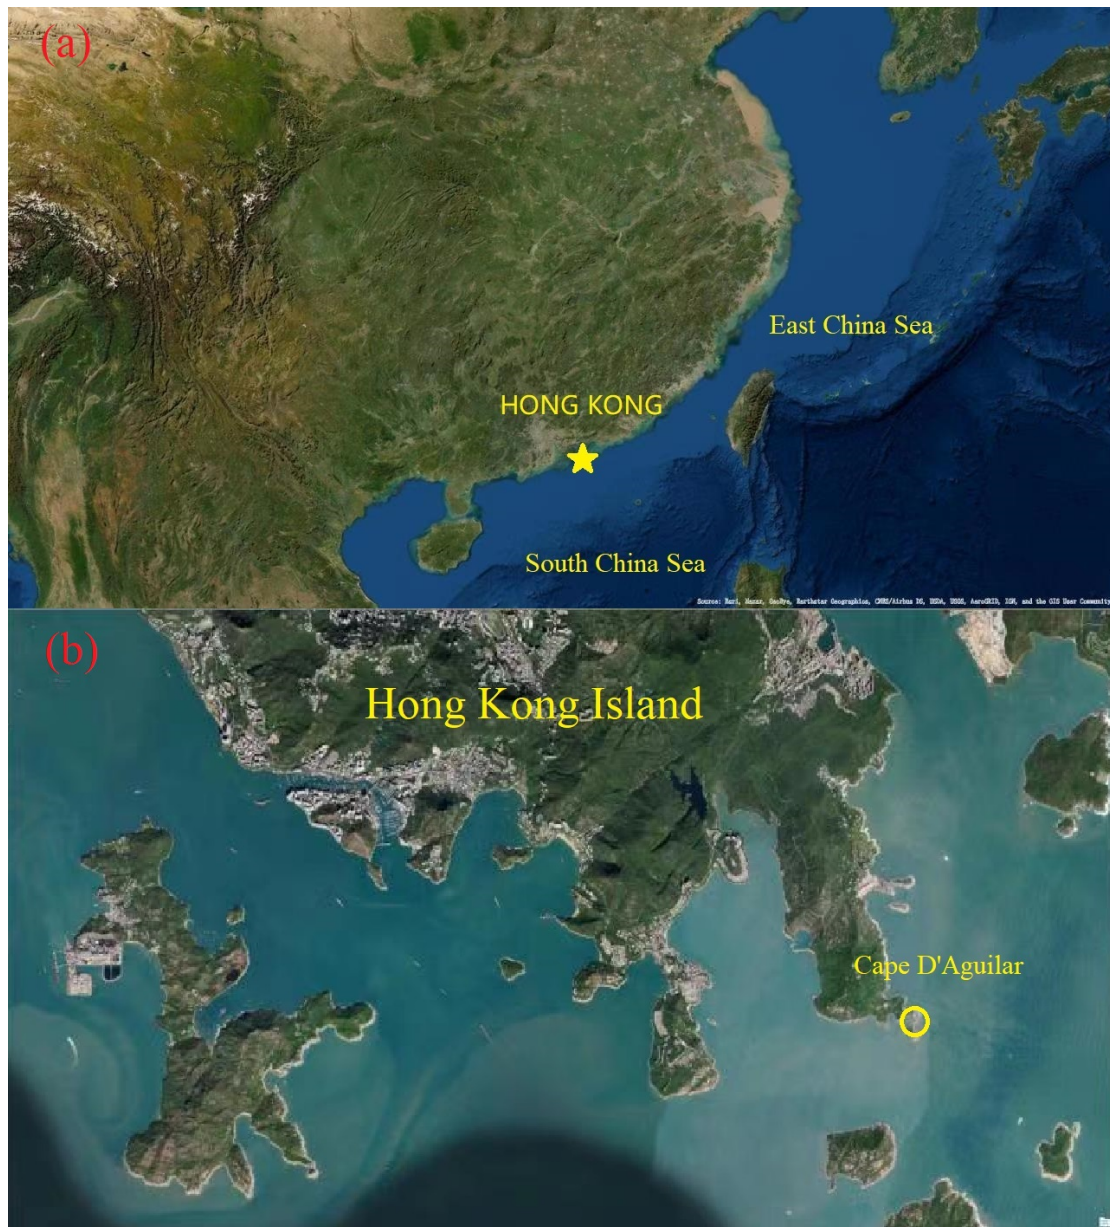

75  
76 **Figure S1.** The location of the observation site, Cape D'Aguilar. (a) The location of  
77 Hong Kong in South China. (b) The field observation site in Hong Kong Island. The  
78 source is from Esri, Maxar, GeoEye, Earthstar Geographics, CNES/Airbus DS, USDA,  
79 USGS, AeroGRID, IGN, and the GIS User Community.

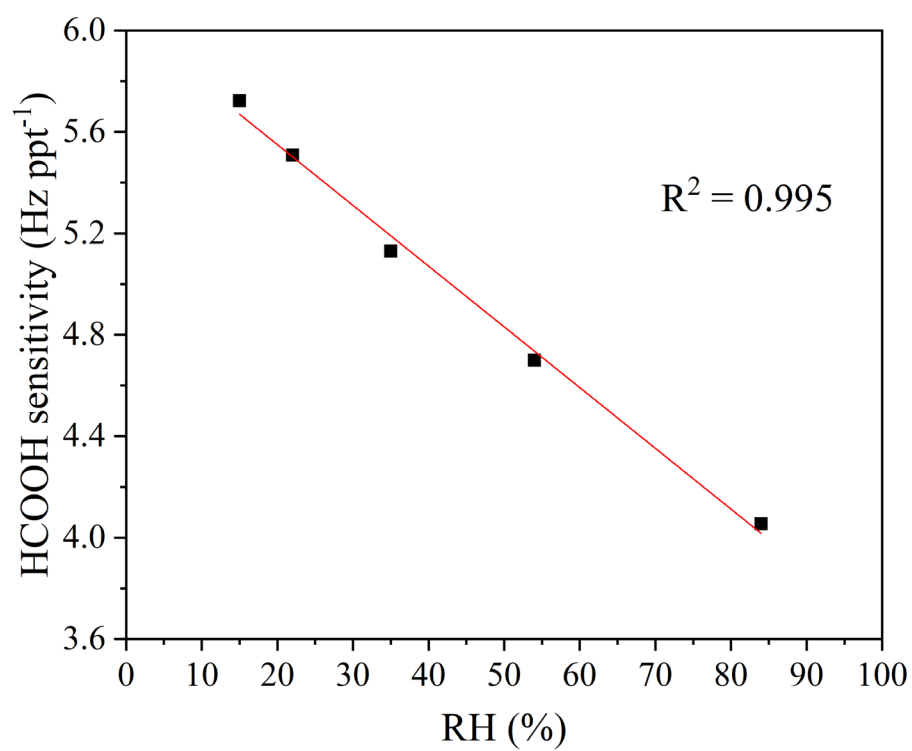

80

81 **Figure S2.** The variation of HCOOH sensitivity with RH.

82

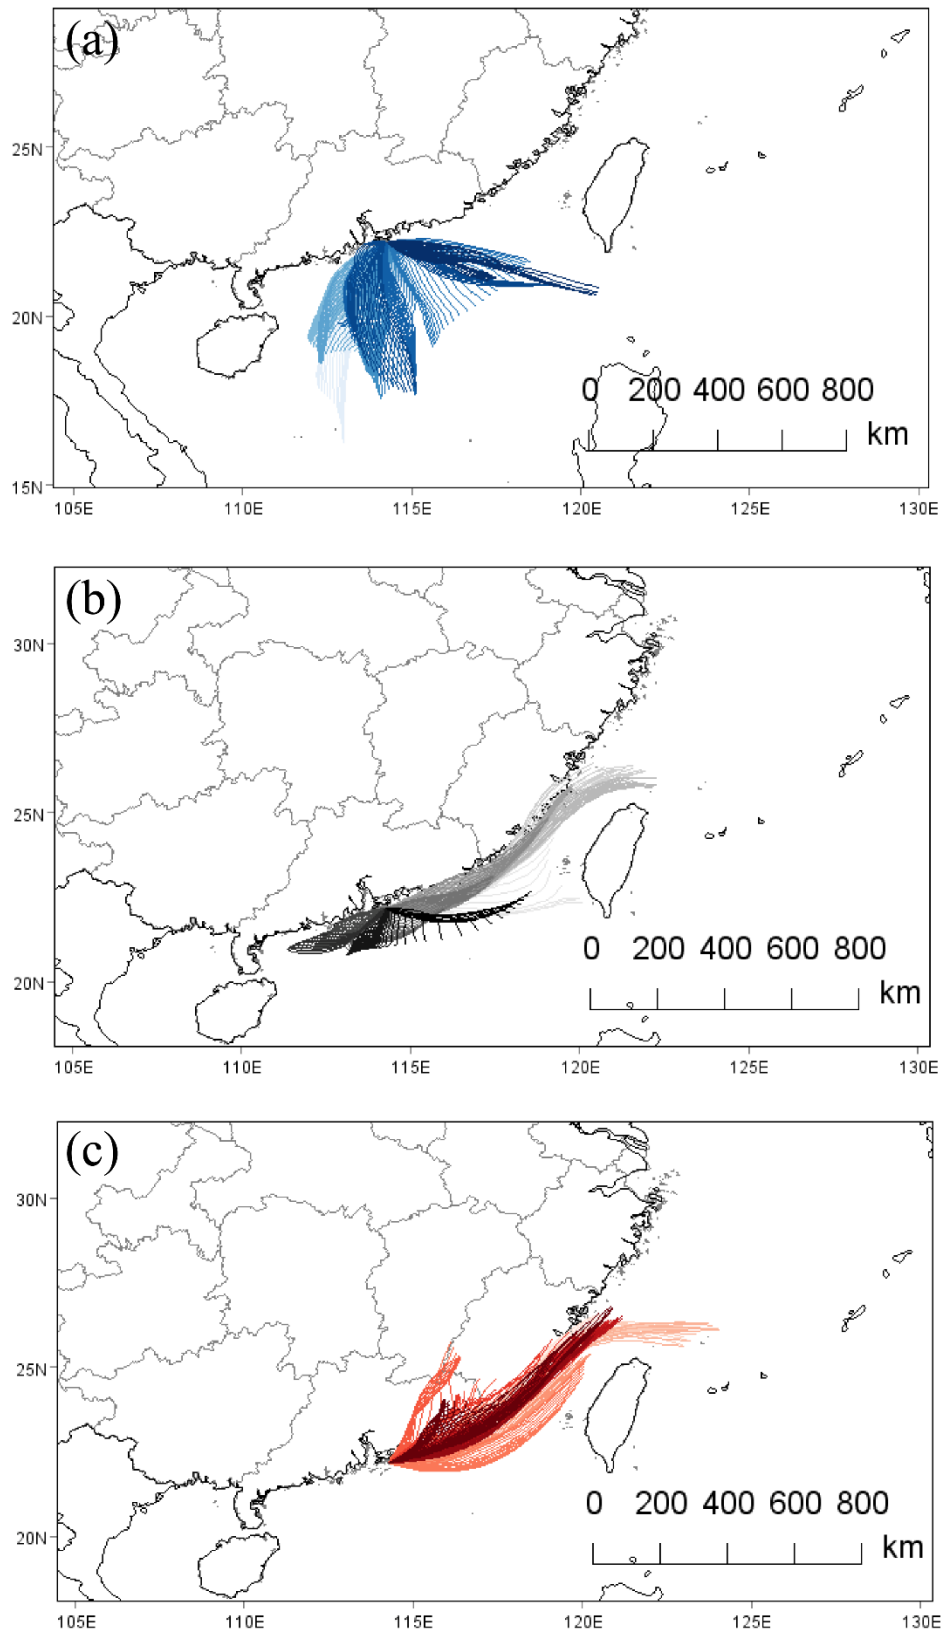

**Figure S3.** The 24-h backward trajectories of different kinds of air masses during the field campaign. The marine air masses occurred during 16–26 August and 11–23 September except 12, 15, and 16 September. The haze period occurred from 24 September to 2 October. The coastal air masses occurred during 4–31 October.

88

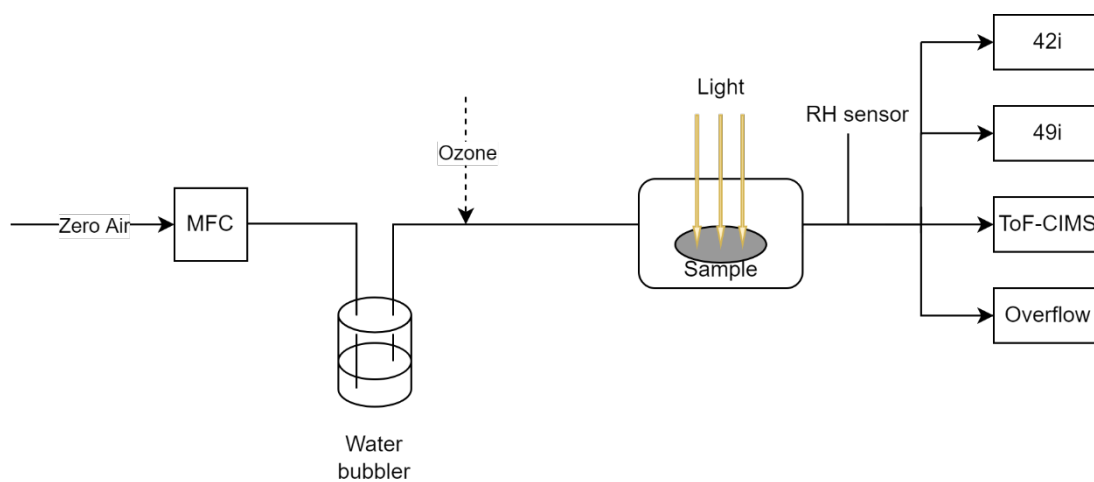

89

90 **Figure S4.** The schematic diagram of the photochemical aging experiment.

91

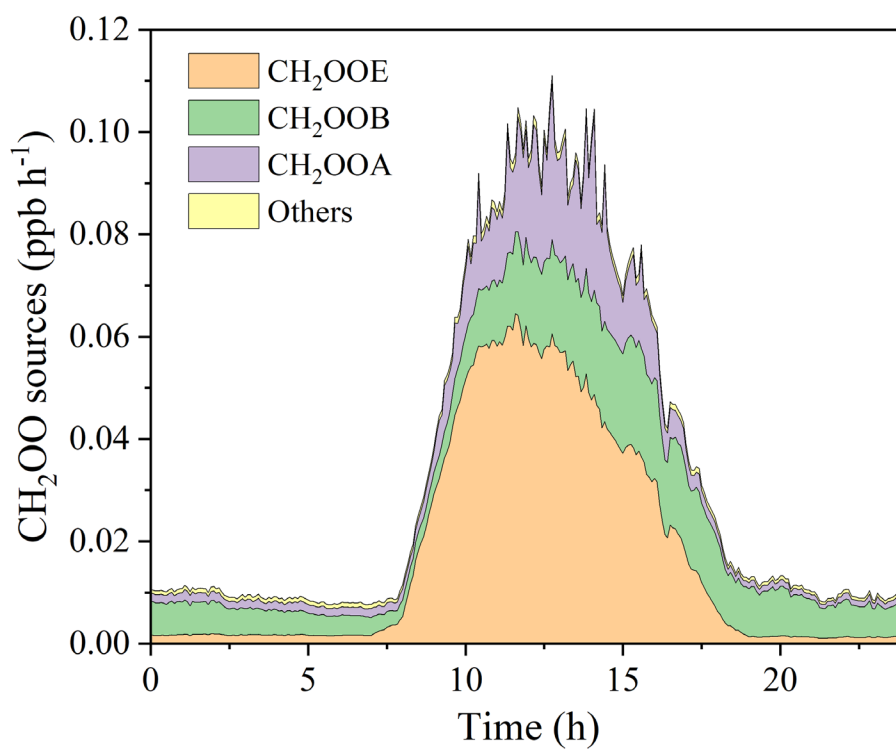

92

93 **Figure S5.** The sources of CH<sub>2</sub>OO in the modified case on 28 September 2021.

94

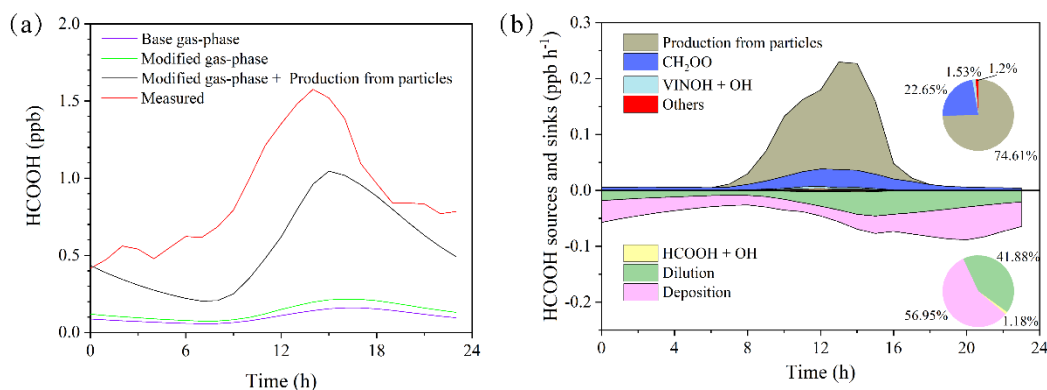

**Figure S6.** The model results on 28 October 2021. (a) The variations of HCOOH concentration. (b) The sources and sinks of HCOOH.

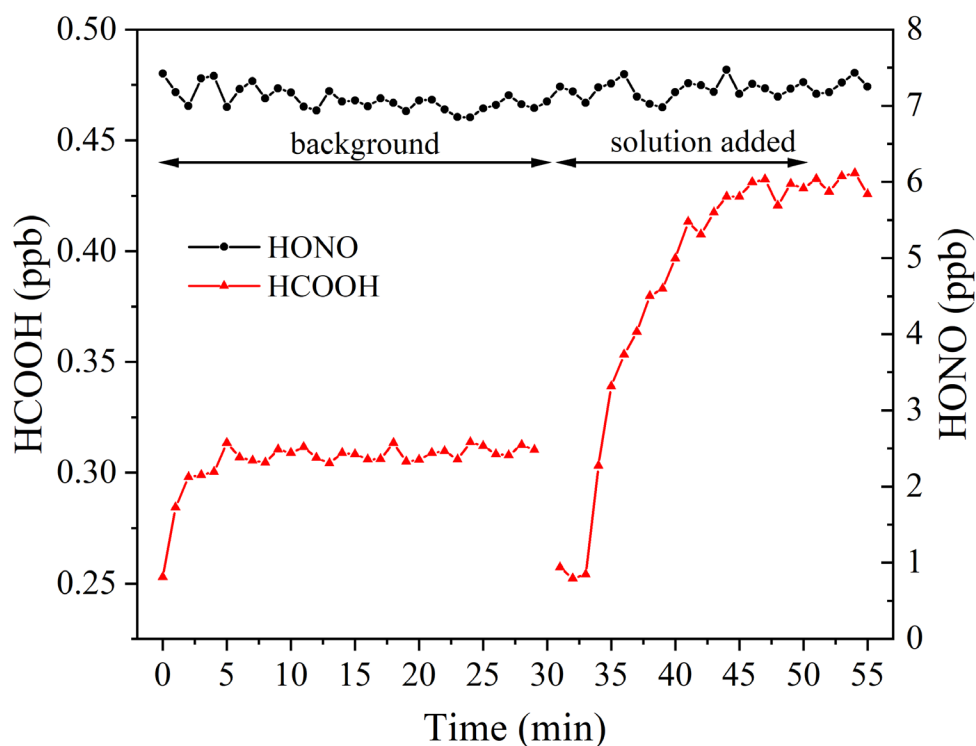

**Figure S7.** Additional laboratory experiments show that HCOOH was produced by nitrate rather than HONO.

102 **Supplementary tables**

103 **Table S1.** The instruments and measured species or parameters in the field campaign.

| Species                                                                                                                                                                                                                                                           | Instruments                                                                                   | Time resolution |
|-------------------------------------------------------------------------------------------------------------------------------------------------------------------------------------------------------------------------------------------------------------------|-----------------------------------------------------------------------------------------------|-----------------|
| HCOOH, HONO, N <sub>2</sub> O <sub>5</sub>                                                                                                                                                                                                                        | Iodide-ToF-CIMS,<br>Aerodyne Inc.                                                             | 1 s             |
| O <sub>3</sub>                                                                                                                                                                                                                                                    | O <sub>3</sub> analyzer, model 49i,<br>Thermo Scientific                                      | 1 min           |
| NO, NO <sub>2</sub>                                                                                                                                                                                                                                               | NO <sub>x</sub> analyzer, model 42i-<br>TL with photolytic<br>converter, Thermo<br>Scientific | 1 min           |
| CO                                                                                                                                                                                                                                                                | CO analyzer, model<br>T300U, Teledyne                                                         | 1 min           |
| SO <sub>2</sub>                                                                                                                                                                                                                                                   | SO <sub>2</sub> analyzer, model<br>T100U, Teledyne                                            | 1 min           |
| jNO <sub>2</sub>                                                                                                                                                                                                                                                  | Filter Radiometer, Metcon                                                                     | 1 min           |
| VOCs                                                                                                                                                                                                                                                              | GC-MS/FID, Chromatotec<br>Group                                                               | 1 h             |
| OVOCs                                                                                                                                                                                                                                                             | Carbonyl sampler, model<br>8000-2, ATEC<br>HPLC                                               | 3 h             |
| Particle number size<br>distribution                                                                                                                                                                                                                              | Scanning mobility particle<br>sizer, TSI                                                      | 5 min           |
| Compositions in PM <sub>2.5</sub><br>and PM <sub>10</sub> (including<br>Na <sup>+</sup> , NH <sub>4</sub> <sup>+</sup> , K <sup>+</sup> , Mg <sup>2+</sup> ,<br>Ca <sup>2+</sup> , Cl <sup>-</sup> , NO <sub>3</sub> <sup>-</sup> , SO <sub>4</sub> <sup>2-</sup> | MARGA                                                                                         | 1 h             |

104

105 **Table S2.** Summary of the PM<sub>2.5</sub> sampling information.

| Date       | RH    | Size (cm <sup>2</sup> ) | Aerosol<br>loading<br>(mg) | Dry-state<br>Surface area<br>density |
|------------|-------|-------------------------|----------------------------|--------------------------------------|
| 2020.10.07 | 72.34 | 51.6                    | 3.33                       | 192.52                               |
| 2020.10.08 | 68.39 | 53.4                    | 3.55                       | 195.89                               |
| 2020.10.26 | 78.85 | 53.4                    | 4.28                       | 119.86                               |
| 2020.11.02 | 65.68 | 56.1                    | 5.55                       | 251.79                               |

|            |       |        |      |        |
|------------|-------|--------|------|--------|
| 2020.11.03 | 69.82 | 52.51  | 4.40 | 233.81 |
| 2020.11.04 | 58.30 | 55.35  | 2.77 | 170.15 |
| 2020.11.05 | 76.32 | 53.352 | 1.95 | 134.89 |

**Table S3.** Input parameters to the box model of 28 September 2021.

| Parameter                                        | Diurnal average<br>value | Parameter           | Diurnal average<br>value |
|--------------------------------------------------|--------------------------|---------------------|--------------------------|
| Temp (K)                                         | 302.34 ± 1.47            | M3PE                | 0.015 ± 0.01             |
| RH(%)                                            | 78.84 ± 5.4              | MEPROPENE           | 0.033 ± 0.005            |
| jNO <sub>2</sub> (s <sup>-1</sup> ) <sup>1</sup> | 0.00744                  | BUT1ENE             | 0.011 ± 0.002            |
| NO <sup>2</sup>                                  | 0.079 ± 0.082            | ME2BUT1ENE          | 0.011 ± 0.003            |
| NO2                                              | 1.82 ± 1.29              | ME2BUT2ENE          | 0.005 ± 0.002            |
| O3                                               | 57.28 ± 9.35             | PENT1ENE            | 0.005 ± 0.001            |
| CO                                               | 217.6 ± 11.3             | APINENE             | 0.021 ± 0.008            |
| SO2                                              | 4.99 ± 0.23              | BPINENE             | 0.016 ± 0.006            |
| N2O5                                             | 0.033 ± 0.025            | EBENZ               | 0.012 ± 0.003            |
| HONO                                             | 0.113 ± 0.026            | OXYL                | 0.009 ± 0.001            |
| CH4 <sup>3</sup>                                 | 2000                     | M2PE                | 0.011 ± 0.012            |
| C2H6                                             | 0.95 ± 0.11              | HCHO                | 2.24 ± 0.28              |
| C3H8                                             | 0.40 ± 0.11              | CH3CHO              | 0.47 ± 0.11              |
| IC4H10                                           | 0.40 ± 0.35              | GLYOX               | 0.057 ± 0.024            |
| NC4H10                                           | 0.17 ± 0.08              | C2H5CHO             | 0.077 ± 0.012            |
| IC5H12                                           | 0.27 ± 0.12              | CH3COCH3            | 4.35 ± 3.54              |
| NC5H12                                           | 0.09 ± 0.02              | MGLYOX              | 0.076 ± 0.020            |
| NC6H14                                           | 0.013 ± 0.008            | MACR                | 0.013 ± 0.006            |
| NC7H16                                           | 0.008 ± 0.004            | IPRCHO              | 0.057 ± 0.003            |
| NC8H18                                           | 0.006 ± 0.001            | MEK                 | 0.155 ± 0.013            |
| C2H2                                             | 0.25 ± 0.03              | BIACET              | 0.051 ± 0.005            |
| C2H4                                             | 0.33 ± 0.05              | C4H9CHO             | 0.016 ± 0.001            |
| C3H6                                             | 0.04 ± 0.007             | C5H11CHO            | 0.017 ± 0.002            |
| C4H6                                             | 0.057 ± 0.004            | BENZAL              | 0.012 ± 0.001            |
| C5H8                                             | 0.82 ± 1.01              | M23C4 <sup>3</sup>  | 0.035                    |
| BENZENE                                          | 0.075 ± 0.014            | M2HEX <sup>3</sup>  | 0.193                    |
| TOLUENE                                          | 0.11 ± 0.08              | M3HEX <sup>3</sup>  | 0.158                    |
| MXYL                                             | 0.02 ± 0.008             | TM123B <sup>3</sup> | 0.029                    |
| M22C4                                            | 0.008 ± 0.001            | TM124B <sup>3</sup> | 0.018                    |

<sup>1</sup> The data shown here is the highest value of jNO<sub>2</sub> (1-min resolution).

110 <sup>2</sup> The unit of the input data below is ppb.

111 <sup>3</sup> These air pollutants were assumed kept at a constant value.

112

### 113 **Reference**

114 Chu, L., & Anastasio, C. (2003). Quantum Yields of Hydroxyl Radical and Nitrogen  
115 Dioxide from the Photolysis of Nitrate on Ice. *Journal of Physical Chemistry A*,  
116 *107*(45), 9594–9602. <https://doi.org/10.1021/jp0349132>

117 Wolfe, G. M., Marvin, M. R., Roberts, S. J., Travis, K. R., & Liao, J. (2016). The  
118 framework for 0-D atmospheric modeling (F0AM) v3.1. *Geoscientific Model*  
119 *Development*, *9*(9), 3309–3319. <https://doi.org/10.5194/GMD-9-3309-2016>

120
